# Supplementary material for: The Role of CDR1as in Proliferation and Differentiation of Human Umbilical Cord-Derived Mesenchymal Stem Cells
Source: Hindawi journal article supplement (doi:10.1155/2019/2316834), 2019-06-12
Supplement: f1 [file 2316834.f1.zip]

Supplementary

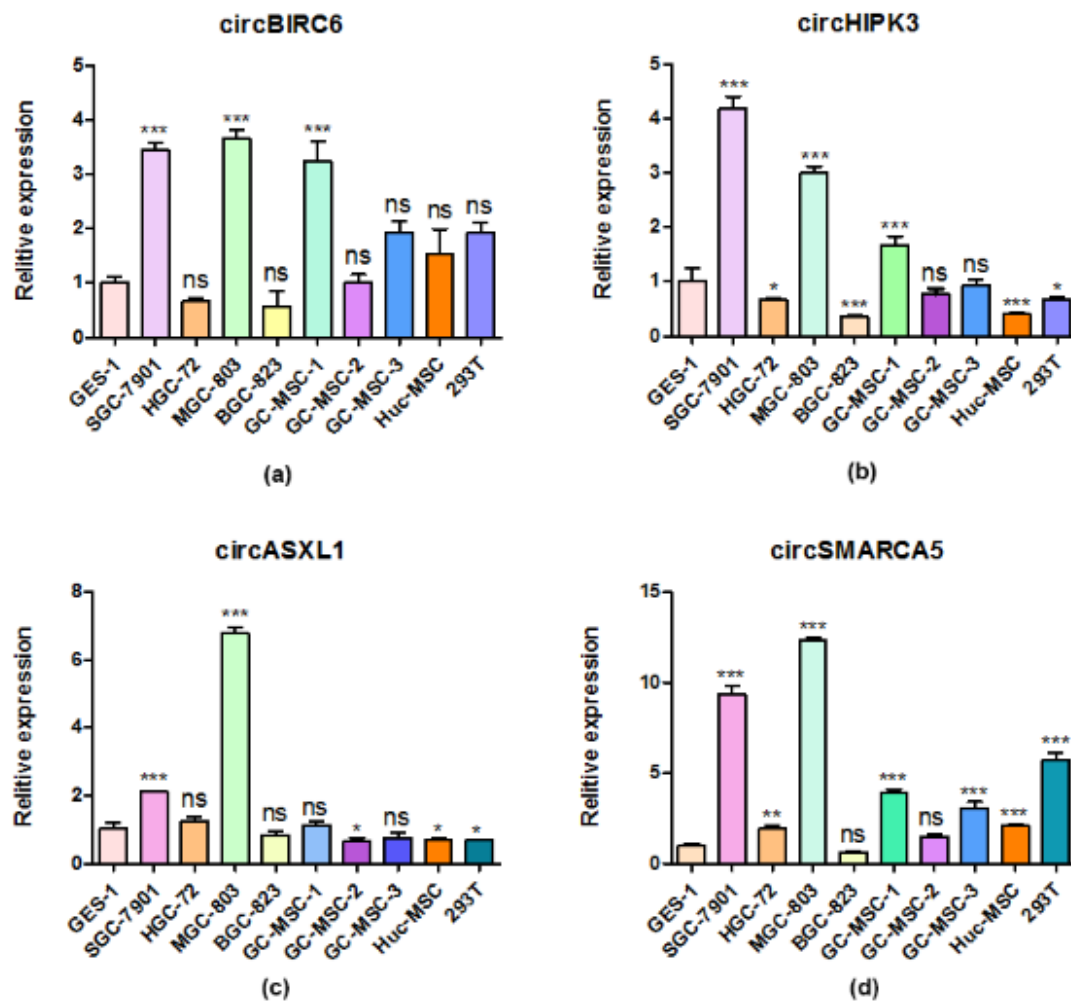

Figure 1. The relative expression levels of circRNAs in different cell lines. (a) qRT-PCR was used to detect the expression level of circBIRC6 in different cell lines; (b) qRT-PCR for detecting the circHIPK3 expression in different cell lines; (c) qRT-PCR was used to analyze the expression level of circASXL1 in different cell lines; (d) qRT-PCR for determining the circSMARCA5 expression in different cell lines. (ns, no significance; \* $P < 0.05$ ; \*\* $P < 0.01$ ; \*\*\* $P < 0.001$ ).
